# Supplementary material for: CO oxidation over embedded Pt nanoparticles on Al2O3 with Al coordination flexibility
Source: Royal Society of Chemistry journal article supplement (doi:10.1039/d3cc01736b), 2023-01-01
Supplement: d3cc01736b1.pdf [file d3cc01736b1.pdf]

Electronic Supplementary Material (ESI) for Chemical Communications.

This journal is @The Royal Society of Chemistry 2022

## Supporting Information

### **CO Oxidation over Embedded Pt Nanoparticles on Al<sub>2</sub>O<sub>3</sub> with Al Coordination Flexibility**

Xiang Wang,<sup>a, c†</sup> Shuangqin Zeng,<sup>b†</sup> Guodong Qi,<sup>\*a, c</sup> Qiang Wang,<sup>a, c</sup> Jun Xu<sup>\*a, c</sup> and  
Feng Deng<sup>a, c</sup>

\*Corresponding author

E-mail: qgdong@wipm.ac.cn; xujun@wipm.ac.cn

## Contents:

### Experimental Section

Catalyst preparation

Catalyst characterization

Evaluation of the catalytic performance

**Figure S1.** Pore size distribution of cf-Al<sub>2</sub>O<sub>3</sub> and  $\gamma$ -Al<sub>2</sub>O<sub>3</sub>.

**Figure S2.** SEM images (a) and XRD patterns (b) of cf-Al<sub>2</sub>O<sub>3</sub> and  $\gamma$ -Al<sub>2</sub>O<sub>3</sub>.

**Table S1.** ICP-OES analysis of Pt content for different samples.

**Figure S3.** TEM images of Pt loaded cf-Al<sub>2</sub>O<sub>3</sub> (left) and  $\gamma$ -Al<sub>2</sub>O<sub>3</sub> (right) catalysts with different metal loading amount from 0.2 wt.% to 10 wt.%.

**Figure S4.** XPS spectra of Pt/cf-Al<sub>2</sub>O<sub>3</sub> and Pt/ $\gamma$ -Al<sub>2</sub>O<sub>3</sub> with 1% and 5% Pt loadings.

**Figure S5.** IR spectra of CO adsorbed on Pt/cf-Al<sub>2</sub>O<sub>3</sub> (a) and Pt/ $\gamma$ -Al<sub>2</sub>O<sub>3</sub> (b) with different Pt loading.

**Table S2.** Pt nanoparticles size for different samples.

**Table S3.** Comparison of the TOF for CO oxidation on Pt/cf-Al<sub>2</sub>O<sub>3</sub> and Pt/ $\gamma$ -Al<sub>2</sub>O<sub>3</sub> catalysts with different Pt loading.

**Figure S6.** CO oxidation stability on Pt/cf-Al<sub>2</sub>O<sub>3</sub> and Pt/ $\gamma$ -Al<sub>2</sub>O<sub>3</sub> with 5% (a) and 10% (b) Pt loading. Reaction conditions: 2.5 vol% CO, 2.5 vol% O<sub>2</sub> and balance He, GHSV:  $6 \times 10^4 \text{ h}^{-1}$ .

**Figure S7.** <sup>27</sup>Al MAS NMR spectra of cf-Al<sub>2</sub>O<sub>3</sub> (a), 1%Pt/cf-Al<sub>2</sub>O<sub>3</sub> (b) and 5%Pt/cf-Al<sub>2</sub>O<sub>3</sub> (c) with different chemical vapor deposition temperature.

**Table S4.** Evolution of Al species on cf-Al<sub>2</sub>O<sub>3</sub>, 1%Pt/cf-Al<sub>2</sub>O<sub>3</sub> and 5%Pt/cf-Al<sub>2</sub>O<sub>3</sub> heated at elevating temperature.

## Experimental Section

### Catalyst preparation

The cf-Al<sub>2</sub>O<sub>3</sub> support was prepared by calcination of aluminum ammonium carbonate hydroxide (AACH) precursor at 600 °C. The precursor AACH was synthesized by a hydrothermal method, in which 3.22 g Al(NO<sub>3</sub>)<sub>3</sub> and 4.64 g CO(NH<sub>2</sub>)<sub>2</sub> were dissolved in 30 ml H<sub>2</sub>O, then the transparent mixture was transferred into a 50 mL Teflon-lined stainless-steel autoclave and maintained at 100 °C in an oven for 48 h. After cooling down to room temperature, the white cylindrical solid was filtered and washed with appropriate amount of ultrapure water and absolute ethyl alcohol, then the solid was dried at 60 °C overnight<sup>1, 2</sup>. γ-Al<sub>2</sub>O<sub>3</sub> was synthesized by a classical method, in which pseudo boehmite was calcined at 600 °C for 12 h with a ramp rate of 3 °C/min<sup>3</sup>.

Vacuum decomposition of platinum acetylacetonate was employed to introduce Pt nanoparticles on cf-Al<sub>2</sub>O<sub>3</sub> and γ-Al<sub>2</sub>O<sub>3</sub> supports. Different amounts of platinum acetylacetonate (1.6mg, 0.2%; 8 mg, 1%; 40mg, 5%; 80mg; 10%) and 400 mg support were mixed and grounded for uniformity. The mixture was transferred to a vacuum line-connected quartz glass tube. After degassing 30 minutes to remove the residual air, the sample was heated in a high-temperature furnace at 3 °C/min until the temperature reached 600 °C and maintained for 10 minutes. The sample turned black quickly as platinum acetylacetonate pyrolyzed. The quartz glass tube was rapidly cooled down with liquid nitrogen to prevent platinum oxidation.

### Catalyst characterization

X-ray diffraction (XRD) patterns were recorded on a Panalytical X' Pert PRO X-ray diffractometer (40 kV, 40 mA) using CuKα1 (λ=1.5406 Å) radiation.

Transmission electron microscopy (TEM) images were obtained on a FEI Tecnai G20 instrument at an accelerating voltage of 200 Kv

CO Diffuse Reflectance FTIR spectroscopy (CO-DRIFTS) measurements were performed on a Bruker Tensor 27 instrument. 120 mg Pt/cf-Al<sub>2</sub>O<sub>3</sub> or Pt/ γ-Al<sub>2</sub>O<sub>3</sub> catalyst with 90% KBr was packed into the in situ FTIR cell in a glovebox under dry

nitrogen atmosphere. The cell was connected to a vacuum apparatus and degased with a pressure below  $10^{-3}$  Pa before adsorption of CO (99.999%, 5 kPa). The DRIFT spectra were recorded by a mercury-cadmium-telluride (MCT) detector with 128 scans at  $4\text{ cm}^{-1}$  resolution. KBr was used for collecting the background spectrum.

$^{27}\text{Al}$  magic angle spinning solid-state nuclear magnetic resonance ( $^{27}\text{Al}$  MAS NMR) was recorded on 18.8T using a Bruker Avance III 800 spectrometer and a 3.2 mm double resonance probe. The resonance frequency was 208.54 MHz for  $^{27}\text{Al}$ . A pulse width of  $0.3\ \mu\text{s}$  corresponding to a  $\pi/12$  flip-angle and a recycle delay of 2 s were used to record the single-pulse  $^{27}\text{Al}$  MAS NMR spectrum at a spinning speed of 20 kHz. The  $^{27}\text{Al}$  chemical shifts were referenced to 1M  $\text{Al}(\text{NO}_3)_3$  aqueous solution (0 ppm).

BET analysis was carried out on a Micromeritics ASAP-2010 Analyzer to measure the surface area.

X-ray photoelectron spectroscopy (XPS) characterization was performed on a Thermo VG Scientific ESCA Multilab-2000 spectrometer (Thermo Electron Corporation). Monochromatized Al  $K\alpha$  (1486.7 eV) was used as the X-ray source.

## **CO oxidation reaction**

For CO oxidation light-on curves measurements, 100 mg catalyst was calcined by air at  $400\text{ }^\circ\text{C}$  for 2h. The catalyst was then reduced in-situ with 5 vol %  $\text{H}_2$  and  $\text{N}_2$  at  $400\text{ }^\circ\text{C}$  for 2 h in a quartz-tube fixed bed reactor. After being cooled to room temperature, the feed gas containing 2.5 vol % CO, 2.5 vol %  $\text{O}_2$  and balance He was allowed to pass through the reactor at a flow rate of  $80\text{ ml}\cdot\text{min}^{-1}$  corresponding to a gas hourly space velocity (GHSV) of  $4.8\cdot 10^4\text{ h}^{-1}$ . The catalyst was heated to the desired temperatures at a rate of  $2^\circ\text{C min}^{-1}$  and then kept for 30 min until the catalytic reaction reached a steady state. Carbon monoxide oxidation tests under different GHSV were performed at the T100 temperature by using 20 mg catalyst, and the flow rate of feed gas varied from 80 ml to 10 ml corresponding to GHSV of  $3\cdot 10^4\text{ h}^{-1}$ ,  $6\cdot 10^4\text{ h}^{-1}$ ,  $1.2\cdot 10^5\text{ h}^{-1}$  and  $2.4\cdot 10^5\text{ h}^{-1}$ , respectively after 30 min reaction time to reach a steady state.

Long-term CO oxidation tests were performed at the  $T_{100}$  temperature using 20 mg cf- $\text{Al}_2\text{O}_3$  and  $\gamma\text{-Al}_2\text{O}_3$  with 5% and 10% Pt loading, and the GHSV was  $2.4 \times 10^5 \text{ h}^{-1}$  (keeping CO conversion below 20%).

The composition of effluent gas was analyzed by a gas spectrometer (GC 2014, Shimadzu, Japan) equipped with a packed column (TDX-1) and a methane converter in front of a flame ionization detector (FID). The methane converter is a micro high-temperature furnace (375 °C) with Ni-based catalyst that can fully convert CO and  $\text{CO}_2$  into  $\text{CH}_4$  for FID detection. The CO conversion was calculated from the change in  $\text{CO}_2$  concentration of the inlet and outlet gases. The TOF calculation is based on the previous literature report and assumes 100% Pt dispersion for all catalyst samples<sup>4</sup>.

The TOF for CO oxidation was calculated by the following method:

$$TOF = \frac{F * \alpha}{V_m * N * w}$$

F= flow rate of CO (1/s)

$\alpha$ = conversion of CO

$V_m$ = molar volume (24.4 L/mol)

N= moles of surface Pt atoms per gram catalyst (mol/g)

w= weight of the catalyst in the reactor (g)

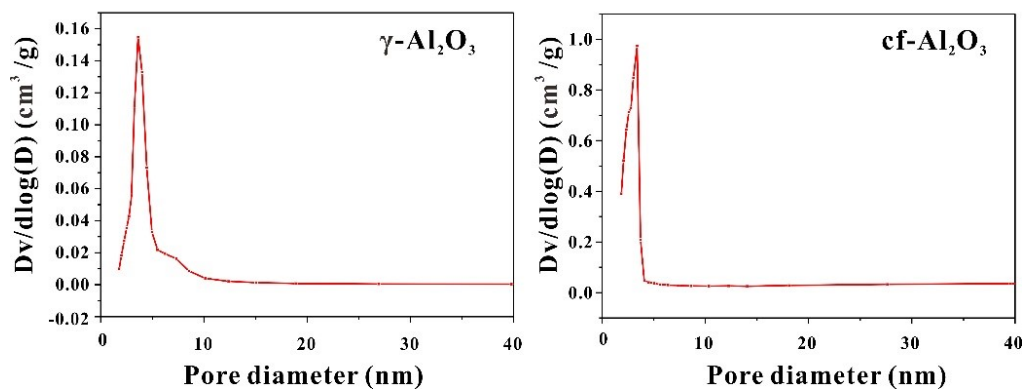

**Figure S1.** Pore size distribution of cf- $\text{Al}_2\text{O}_3$  and  $\gamma\text{-Al}_2\text{O}_3$ .

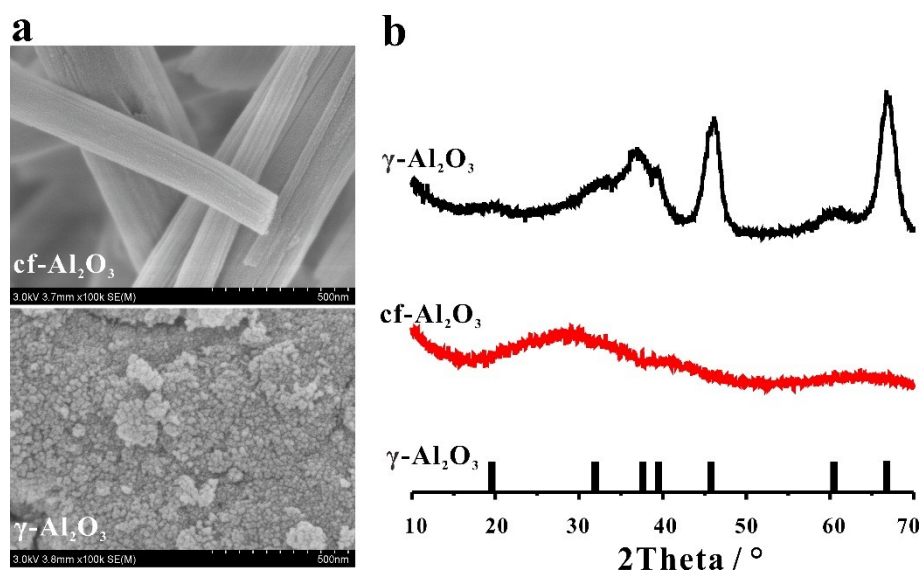

**Figure S2.** SEM images (a) and XRD patterns (b) of  $\text{cf-Al}_2\text{O}_3$  and  $\gamma\text{-Al}_2\text{O}_3$ .

**Table S1.** ICP-OES analysis of Pt content for different samples.

| <b>Samples</b>                                  | <b>Actual Pt loading (wt.%)</b> | <b>Target Pt loading (wt.%)</b> |
|-------------------------------------------------|---------------------------------|---------------------------------|
| 0.2Pt/ $\gamma$ -Al <sub>2</sub> O <sub>3</sub> | 0.20                            | 0.2                             |
| 1Pt/ $\gamma$ -Al <sub>2</sub> O <sub>3</sub>   | 0.82                            | 1                               |
| 5Pt/ $\gamma$ -Al <sub>2</sub> O <sub>3</sub>   | 4.1                             | 5                               |
| 10Pt/ $\gamma$ -Al <sub>2</sub> O <sub>3</sub>  | 7.26                            | 10                              |
| 0.2Pt/cf-Al <sub>2</sub> O <sub>3</sub>         | 0.17                            | 0.2                             |
| 1Pt/cf-Al <sub>2</sub> O <sub>3</sub>           | 0.75                            | 1                               |
| 5Pt/cf-Al <sub>2</sub> O <sub>3</sub>           | 3.59                            | 5                               |
| 10Pt/cf-Al <sub>2</sub> O <sub>3</sub>          | 7.55                            | 10                              |



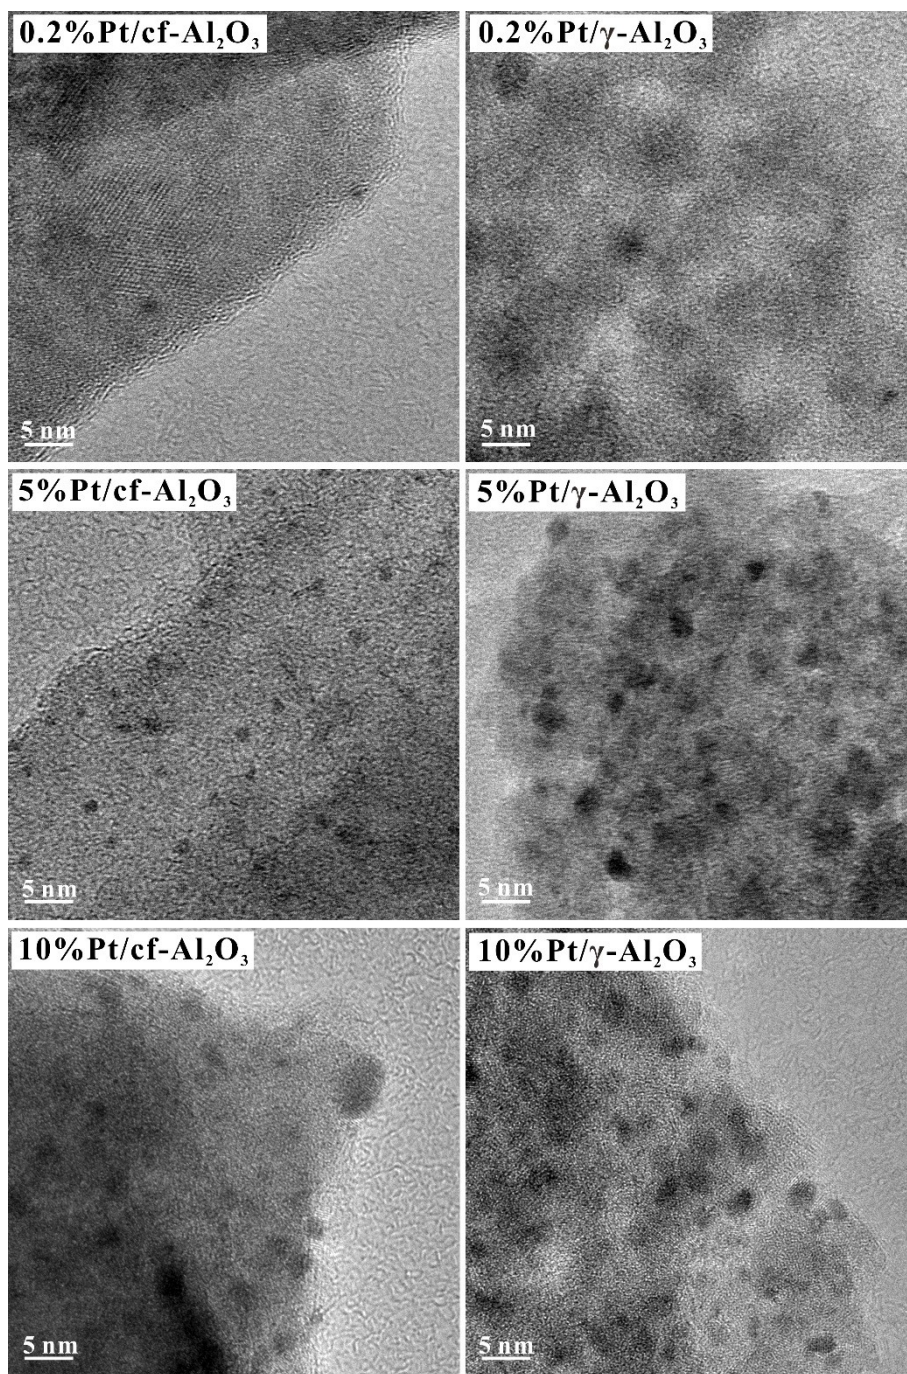

**Figure S3.** TEM images of Pt loaded cf-Al<sub>2</sub>O<sub>3</sub> (left) and γ-Al<sub>2</sub>O<sub>3</sub> (right) catalysts with different metal loading amount from 0.2 wt.% to 10 wt.%.

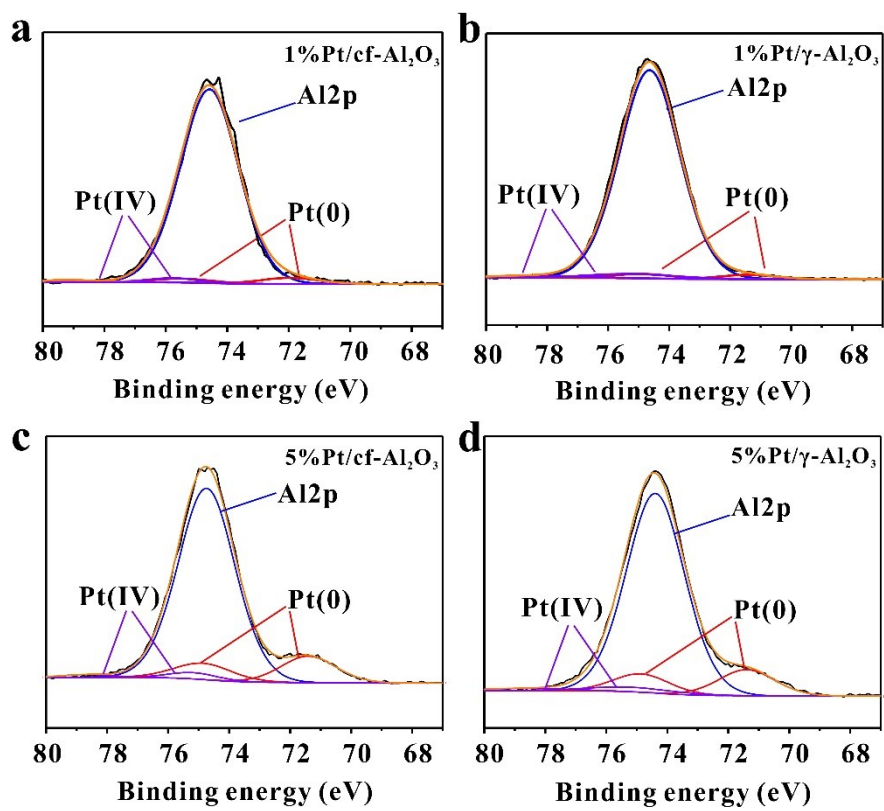

**Figure S4.** XPS spectra of Pt/cf-Al<sub>2</sub>O<sub>3</sub> and Pt/ $\gamma$ -Al<sub>2</sub>O<sub>3</sub> with 1% and 5% Pt loadings.

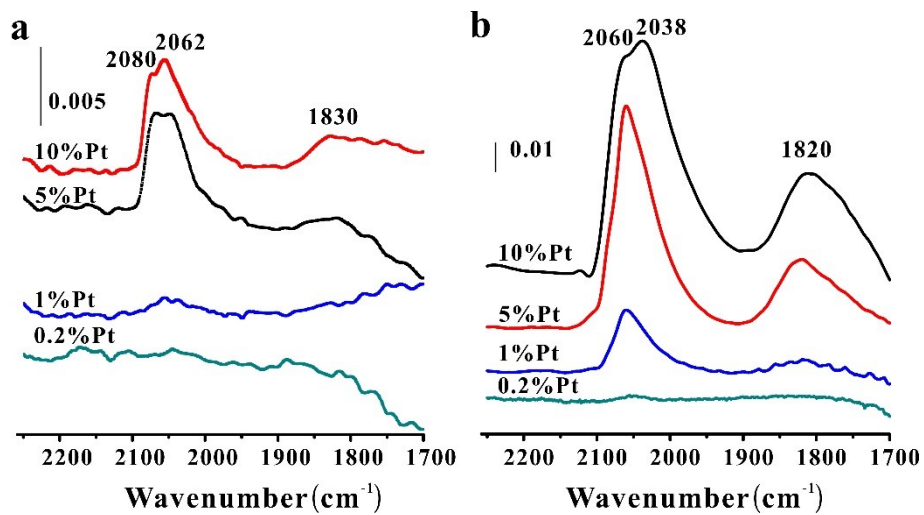

**Figure S5.** IR spectra of CO adsorbed on Pt/cf-Al<sub>2</sub>O<sub>3</sub> (a) and Pt/γ-Al<sub>2</sub>O<sub>3</sub> (b) with different Pt loading.

**Table S2.** Pt nanoparticles size for different samples.

| Samples                                          | Pt nanoparticles size (nm) |
|--------------------------------------------------|----------------------------|
| 0.2%Pt/ $\gamma$ -Al <sub>2</sub> O <sub>3</sub> | 0.93 ± 0.29                |
| 1%Pt/ $\gamma$ -Al <sub>2</sub> O <sub>3</sub>   | 1.21 ± 0.22                |
| 5%Pt/ $\gamma$ -Al <sub>2</sub> O <sub>3</sub>   | 1.25 ± 0.25                |
| 10%Pt/ $\gamma$ -Al <sub>2</sub> O <sub>3</sub>  | 1.28 ± 0.27                |
| 0.2%Pt/cf-Al <sub>2</sub> O <sub>3</sub>         | 0.68 ± 0.02                |
| 1%Pt/cf-Al <sub>2</sub> O <sub>3</sub>           | 0.92 ± 0.11                |
| 5%Pt/cf-Al <sub>2</sub> O <sub>3</sub>           | 1.07 ± 0.19                |
| 10%Pt/cf-Al <sub>2</sub> O <sub>3</sub>          | 1.70 ± 0.48                |

**Table S3.** Comparison of the TOF for CO oxidation on Pt/cf-Al<sub>2</sub>O<sub>3</sub> and Pt/ $\gamma$ -Al<sub>2</sub>O<sub>3</sub> catalysts with different Pt loading.

| Supports                                         | Pt loading (wt.%) | CO/O <sub>2</sub>                        | T(°C) | Conversion (%) | TOF (s <sup>-1</sup> ) | Notes             |
|--------------------------------------------------|-------------------|------------------------------------------|-------|----------------|------------------------|-------------------|
| cf-Al <sub>2</sub> O <sub>3</sub>                | 0.2               |                                          | 260   | 7.14           | 0.560                  |                   |
|                                                  | 1                 |                                          | 220   | 6.50           | 0.115                  |                   |
|                                                  | 5                 | 2.5%CO                                   | 170   | 4.12           | 0.015                  |                   |
|                                                  | 10                | 2.5%O <sub>2</sub>                       | 150   | 4.48           | 0.008                  | This work         |
| $\gamma$ -Al <sub>2</sub> O <sub>3</sub>         | 0.2               | 95%He                                    | 240   | 5.68           | 0.378                  |                   |
|                                                  | 1                 |                                          | 200   | 5.58           | 0.093                  |                   |
|                                                  | 5                 |                                          | 160   | 3.22           | 0.010                  |                   |
|                                                  | 10                |                                          | 150   | 3.90           | 0.007                  |                   |
| m-Al <sub>2</sub> O <sub>3</sub> -H <sub>2</sub> | 0.2               | 2.5%CO<br>2.5%O <sub>2</sub><br>95%Ar    | 250   | 13.2           | 0.175                  | Ref. <sup>5</sup> |
| $\theta$ -Al <sub>2</sub> O <sub>3</sub>         | 0.18              | 3.7%CO<br>3.7%O <sub>2</sub><br>93.6%He  | 251   | ~10            | 0.187                  | Ref. <sup>6</sup> |
| Al <sub>2</sub> O <sub>3</sub>                   | 0.4               | 25%CO<br>25%O <sub>2</sub><br>50%balance | 150   | ~10            | 0.005                  | Ref. <sup>4</sup> |

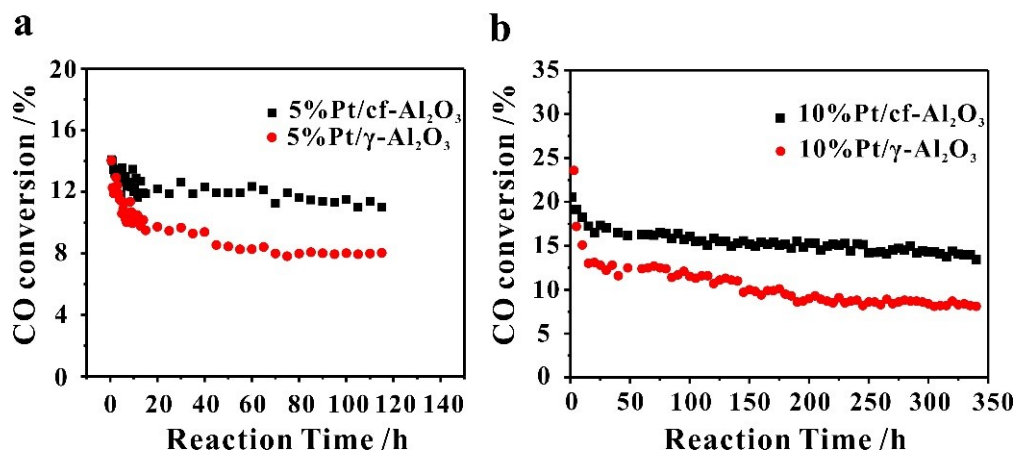

**Figure S6.** CO oxidation stability on Pt/cf-Al<sub>2</sub>O<sub>3</sub> and Pt/γ-Al<sub>2</sub>O<sub>3</sub> with 5% (a) and 10% (b) Pt loading. Reaction conditions: 2.5 vol% CO, 2.5 vol% O<sub>2</sub> and balance He, GHSV: 6\*10<sup>4</sup> h<sup>-1</sup>.

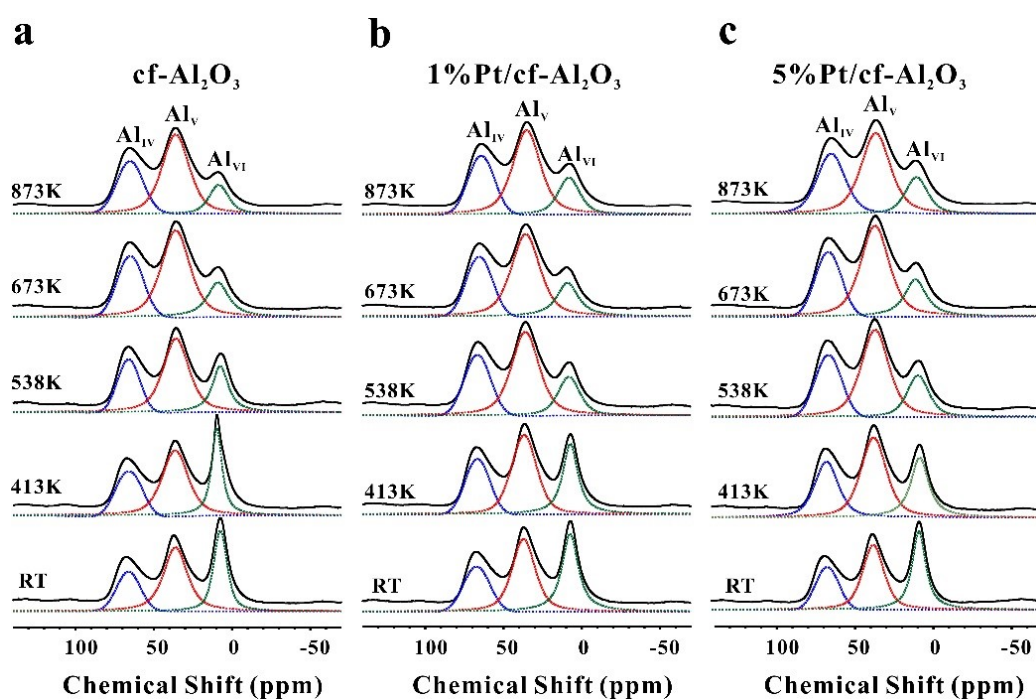

**Figure S7.**  $^{27}\text{Al}$  MAS NMR spectra of  $\text{cf-Al}_2\text{O}_3$  (a),  $1\% \text{Pt/cf-Al}_2\text{O}_3$  (b) and  $5\% \text{Pt/cf-Al}_2\text{O}_3$  (c) with different chemical vapor deposition temperature.

**Table S4.** Evolution of Al species on cf-Al<sub>2</sub>O<sub>3</sub>, 1%Pt/cf-Al<sub>2</sub>O<sub>3</sub> and 5%Pt/cf-Al<sub>2</sub>O<sub>3</sub> heated at elevating temperature.

| Support                                | Temperature | Al <sub>IV</sub><br>(%) | Al <sub>V</sub><br>(%) | Al <sub>VI</sub><br>(%) |
|----------------------------------------|-------------|-------------------------|------------------------|-------------------------|
| cf-Al <sub>2</sub> O <sub>3</sub>      | RT          | 20.9                    | 44.4                   | 34.7                    |
| 1%Pt/cf-Al <sub>2</sub> O <sub>3</sub> |             | 22.7                    | 41.3                   | 36.0                    |
| 5%Pt/cf-Al <sub>2</sub> O <sub>3</sub> |             | 22.9                    | 40.8                   | 36.3                    |
| cf-Al <sub>2</sub> O <sub>3</sub>      | 413K        | 22.9                    | 47.6                   | 29.5                    |
| 1%Pt/cf-Al <sub>2</sub> O <sub>3</sub> |             | 25.6                    | 44.8                   | 29.6                    |
| 5%Pt/cf-Al <sub>2</sub> O <sub>3</sub> |             | 28.4                    | 44.4                   | 27.2                    |
| cf-Al <sub>2</sub> O <sub>3</sub>      | 538K        | 24.6                    | 52.4                   | 23.0                    |
| 1%Pt/cf-Al <sub>2</sub> O <sub>3</sub> |             | 28.4                    | 52.6                   | 19.0                    |
| 5%Pt/cf-Al <sub>2</sub> O <sub>3</sub> |             | 27.9                    | 52.6                   | 19.4                    |
| cf-Al <sub>2</sub> O <sub>3</sub>      | 673K        | 27.4                    | 53.8                   | 18.8                    |
| 1%Pt/cf-Al <sub>2</sub> O <sub>3</sub> |             | 28.2                    | 53.2                   | 18.6                    |
| 5%Pt/cf-Al <sub>2</sub> O <sub>3</sub> |             | 27.8                    | 53.5                   | 18.7                    |
| cf-Al <sub>2</sub> O <sub>3</sub>      | 873K        | 26.5                    | 54.0                   | 19.5                    |
| 1%Pt/cf-Al <sub>2</sub> O <sub>3</sub> |             | 26.5                    | 54.0                   | 19.5                    |
| 5%Pt/cf-Al <sub>2</sub> O <sub>3</sub> |             | 26.5                    | 54.0                   | 19.5                    |



## References

1. L. Shi, G. M. Deng, W. C. Li, S. Miao, Q. N. Wang, W. P. Zhang and A. H. Lu, *Angew. Chem. Int. Ed.*, 2015, **54**, 13994-13998.
2. Z. Zhao, D. Xiao, K. Chen, R. Wang, L. Liang, Z. Liu, I. Hung, Z. Gan and G. Hou, *ACS Cent. Sci.*, 2022, **8**, 795-803.
3. S. J. Wilson, *Mineral. Mag.*, 1979, **43**, 301-306.
4. Y. J. Mergler, A. vanAalst, J. vanDelft and B. E. Nieuwenhuys, *Appl. Catal., B*, 1996, **10**, 245-261.
5. Z. L. Zhang, Y. H. Zhu, H. Asakura, B. Zhang, J. G. Zhang, M. X. Zhou, Y. Han, T. Tanaka, A. Q. Wang, T. Zhang and N. Yan, *Nat. Commun.*, 2017, **8**.
6. M. Moses-DeBusk, M. Yoon, L. F. Allard, D. R. Mullins, Z. L. Wu, X. F. Yang, G. Veith, G. M. Stocks and C. K. Narula, *J. Am. Chem. Soc.*, 2013, **135**, 12634-12645.
